# Supplementary material
Source: PubMed Central journal article supplement (PMC2662227)
Supplement: M803408200_1.pdf [file M803408200_1.pdf]

**Supplementary Figure S1** Contribution of protein concentration to  $\alpha$ -helix formation. Two different protein concentrations are monitored at low ionic strength and 20 mM phosphate buffer pH 8.0. Buffer subtraction and smoothing procedures according to the Savitzky-Golay method were performed using the Spectra Manager software (Jasco Corp.).

**Supplementary Figure S2.** The temperature dependence of the coefficients of the first four basis vectors of the Singular Value Decomposition analysis of thermal unfolding CD data. Dots are projections of the experimental FarUV CD data on the first four basis vectors. In contrast to the first two states which are significant, the projections of the third and fourth eigenvectors vary randomly with temperature.

### **Supplementary Figure S3**

Far-UV CD spectrum of the HrpO-HrpE complex after incubation of 0.0074 mM HrpO with 0.0074 mM HrpE, and individual CD spectra of each protein (0.0074 mM HrpO and 0.0074 mM HrpE). The calculated spectrum for the HrpO-HrpE complex is the sum of the individual experimental spectra of HrpO and HrpE. Buffer subtraction, smoothing procedures according to the Savitzky-Golay method and the summation of CD spectra were performed using the Spectra Manager software (Jasco Corporation). Far-UV CD spectra are not plotted beyond the point where the HT-value increases above 600.

### **Supplementary Figure S4**

Contribution of increasing HrpO concentration to  $\alpha$ -helical ordering effects. Experimental and calculated Far-UV CD spectra are shown for 0.0296 mM HrpO. The calculated spectrum is obtained by multiplying the experimental spectrum of 0.0074 mM HrpO by 4. Buffer subtraction, smoothing procedures according to the Savitzky-Golay method and multiplication of spectra were performed using the Spectra Manager software (Jasco Corporation). Far-UV CD spectra are not plotted beyond the point where the HT-value increases above 600.

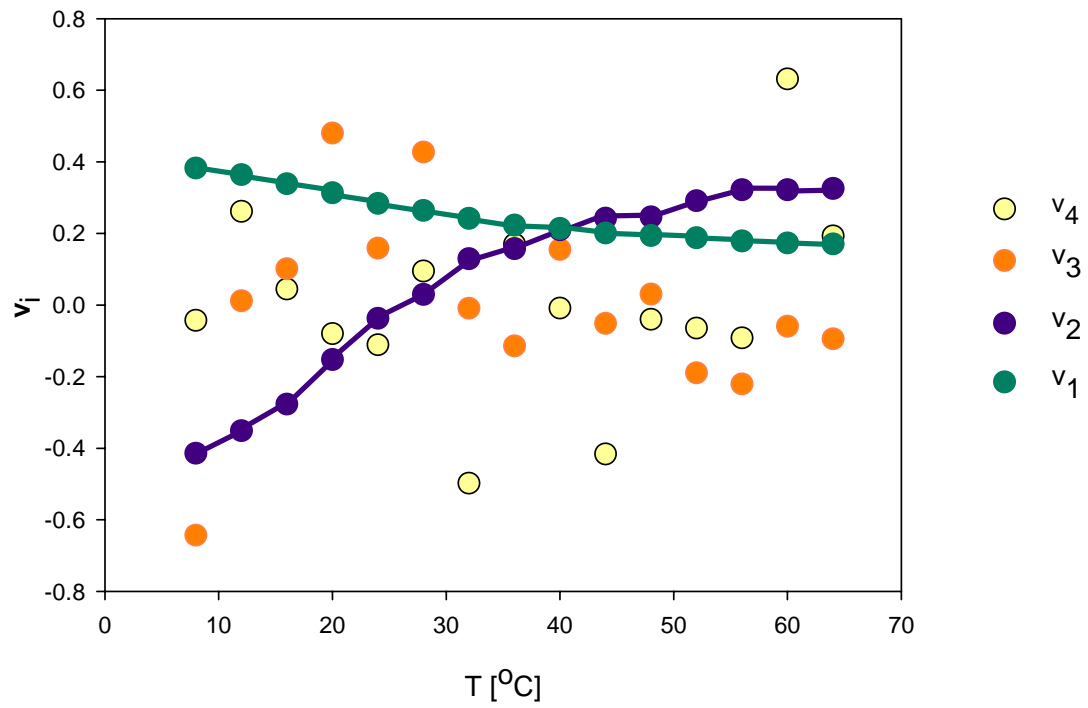

Supplementary Figure S2

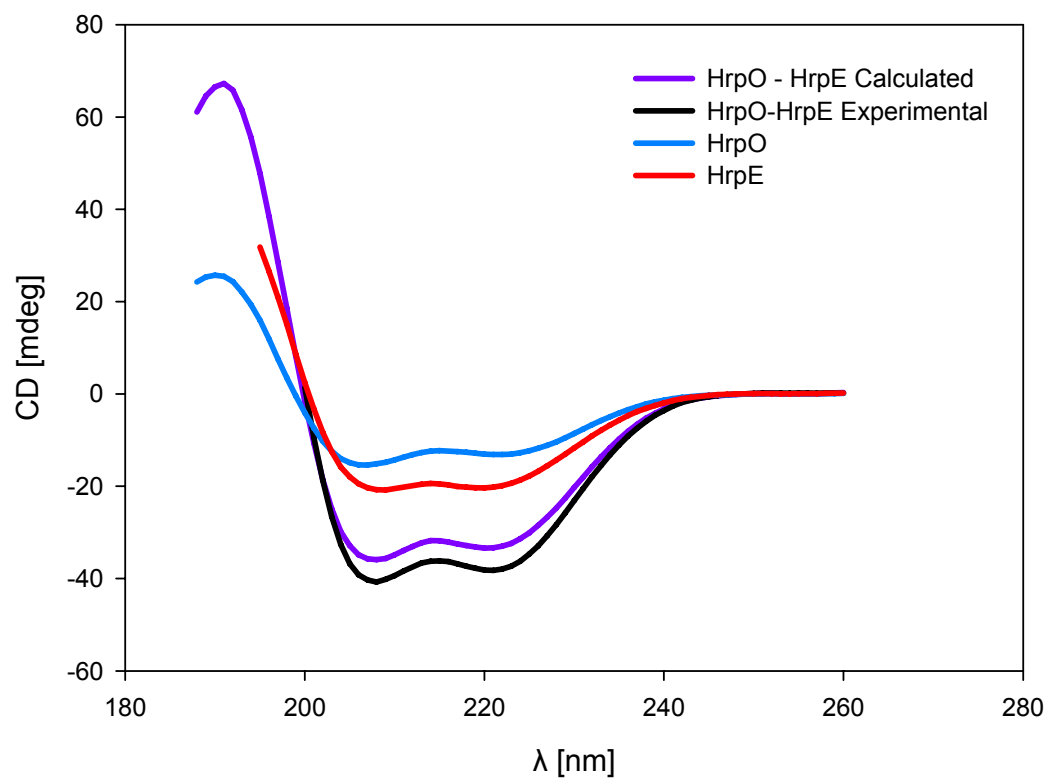

Supplementary Figure S3

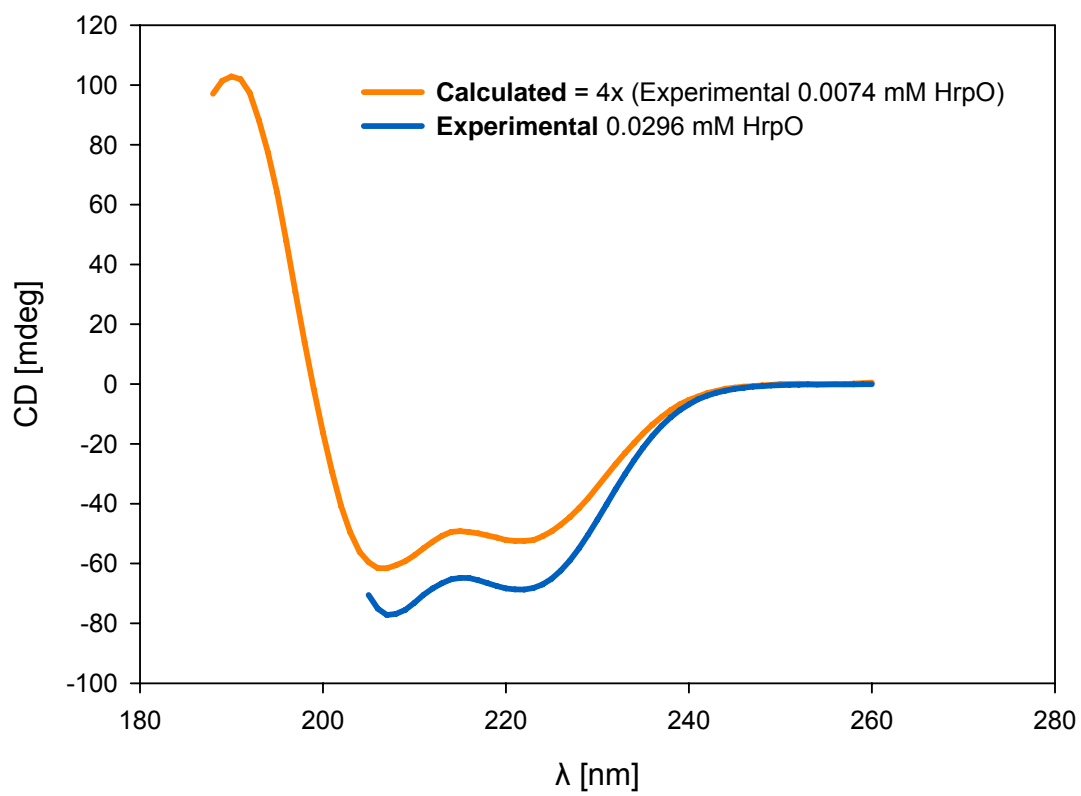

**Supplementary Figure S4**
