# Supplementary material
Source: PubMed Central journal article supplement (PMC2662227)
Supplement: M803408200_2.pdf [file M803408200_2.pdf]

**Supplementary Table S1.** SAXS parameters for HrpO

| <b>HrpO<br/>concentration<br/>(mg/ml)</b> | <b>Guinier Approximation</b> |                          |                                          | <b>Porod Law</b>         |                          |                                         | <b>Pair distribution<br/>function</b> |                        | <b>R<sub>g</sub> Cross<br/>Section<br/>[Å]</b> |
|-------------------------------------------|------------------------------|--------------------------|------------------------------------------|--------------------------|--------------------------|-----------------------------------------|---------------------------------------|------------------------|------------------------------------------------|
|                                           | <b>sR<sub>g</sub> limits</b> | <b>R<sub>g</sub> [Å]</b> | <b>MW<sup>§</sup> from<br/>I(0) [kD]</b> | <b>V[nm<sup>3</sup>]</b> | <b>R<sub>g</sub> [Å]</b> | <b>MW for<br/>globular<br/>particle</b> | <b>R<sub>g</sub> [Å]</b>              | <b>D<sub>max</sub></b> |                                                |
| <b>1.8</b>                                | 0.741-1.28                   | 35.0                     | 22.9                                     | 42.558                   | 34.5                     | 22.7                                    | 35.2                                  | 110                    | 12.5                                           |
| <b>3.6</b>                                | 0.695-1.26                   | 41.4                     | 35.5                                     | 60.405                   | 42.0                     | 35.8                                    | 43.2                                  | 155                    | 15.4                                           |
| <b>7.3</b>                                | 0.697-1.28                   | 53.3                     | 77.2                                     | 199.36                   | 54.9                     | 77.9                                    | 56.3                                  | 210                    | 21.3                                           |

<sup>§</sup>The molecular weight is calculated from the intensity at zero angle I(0) using the I(0) of a known molecular marker (BSA) as reference.
