# Supplementary material
Source: PubMed Central journal article supplement (PMC2662227)
Supplement: M803408200_3.pdf [file M803408200_3.pdf]

**Supplementary Table S2.** Sequence characteristics of proteins that are encoded by genes immediately downstream of the *atpase* gene in various T3SS gene clusters.

| T3SS family | Organism                                                        | Gene / Locus | Entrez Protein ID | Number of residues | Predicted disordered segments <sup>‡</sup> % | Predicted $\alpha$ -helix % | Predicted heptad repeats % |
|-------------|-----------------------------------------------------------------|--------------|-------------------|--------------------|----------------------------------------------|-----------------------------|----------------------------|
| Ysc         | <i>Aeromonas salmonicida</i> subsp. <i>salmonicida</i> A449     | <i>ascO</i>  | YP_00114<br>4299  | 153                | 98.7                                         | 94.0                        | 95                         |
|             | <i>Photorhabdus luminescens</i>                                 | <i>lscO</i>  | AAO1804<br>3      | 153                | 100                                          | 94.0                        | 79                         |
|             | <i>Pseudomonas aeruginosa</i> PAO1                              | <i>pscO</i>  | NP_25038<br>7     | 158                | 94.3                                         | 91.1                        | 92                         |
|             | <i>Yersinia pestis</i> CO92                                     | <i>yscO</i>  | NP_39517<br>5     | 154                | 100                                          | 94.8                        | 90                         |
|             | <i>Vibrio parahaemolyticus</i> RIMD 2210633                     | <i>yscO</i>  | BAC5993<br>2      | 153                | 96.1                                         | 96.7                        | 91                         |
|             | <i>Bordetella pertussis</i> Tohama I                            | <i>bscO</i>  | NP_88088<br>7     | 169                | 57.4                                         | 91                          | 88                         |
| Hrc1        | <i>Pseudomonas syringae</i> pv. <i>phaseolicola</i>             | <i>hrpO</i>  | AAC2506<br>5      | 148                | 72.3                                         | 93.2                        | 77                         |
|             | <i>Pantoea stewartii</i> subsp. <i>stewartii</i>                | <i>hrpO</i>  | ABB7741<br>3      | 146                | 100                                          | 95.2                        | 76                         |
|             | <i>Erwinia amylovora</i>                                        | <i>hrpO</i>  | AAB0600<br>2      | 148                | 100                                          | 95.9                        | 76                         |
| Hrc2        | <i>Ralstonia solanacearum</i> GMI1000                           | <i>hrpd</i>  | CAD1802<br>2      | 166                | 71.7                                         | 92.2                        | 83                         |
|             | <i>Burkholderia pseudomallei</i>                                | <i>orf7</i>  | AAK7323<br>2      | 168                | 54.7                                         | 92.9                        | 75                         |
|             | <i>Xanthomonas campestris</i> pv. <i>vesicatoria</i> str. 85-10 | <i>hrpB7</i> | CAJ22064          | 169                | 51.5                                         | 90.5                        | 63                         |
| Ssa-Esc     | <i>Salmonella typhimurium</i> LT2 (SPI-2)                       | <i>ssaO</i>  | NP_46038<br>1     | 125                | 40.8                                         | 85.6                        | 72                         |

| T3SS family         | Organism                                                                     | Gene / Locus     | Entrez Protein ID | Number of residues | Predicted disordered segments <sup>‡</sup> % | Predicted $\alpha$ -helix % | Predicted heptad repeats % |
|---------------------|------------------------------------------------------------------------------|------------------|-------------------|--------------------|----------------------------------------------|-----------------------------|----------------------------|
|                     | <i>Edwardsiella tarda</i>                                                    | <i>orf1B</i>     | AAX7691<br>9      | 122                | 83.6                                         | 86.0                        | 97                         |
|                     | <i>Yersinia pestis</i> CO92                                                  | <i>ypO0268</i>   | NP_40391<br>9     | 133                | 100                                          | 91.0                        | 85                         |
|                     | Enteropathogenic<br><i>Escherichia coli</i><br>E2348/69                      | <i>orf15</i>     | AAK2671<br>6      | 125                | 77.6                                         | 88.8                        | 83                         |
|                     | <i>Chromobacterium violaceum</i> ATCC<br>12472                               | <i>CV_2604</i>   | AAQ6027<br>4      | 119                | 68.9                                         | 91.6                        | 88                         |
|                     | <i>Salmonella enterica</i><br>subsp. enterica<br>serovar Typhi str.<br>CT18  | <i>ssaO</i>      | NP_45611<br>2     | 125                | 40.8                                         | 86.4                        | 87                         |
|                     | <i>Salmonella enterica</i><br>(serovar typhimurium) LT2                      | <i>invI</i>      | NP_46181<br>4     | 147                | 58.5                                         | 92.5                        | 79                         |
|                     | <i>Burkholderia pseudomallei</i><br>K96243                                   | <i>bsaT</i>      | YP_11154<br>6     | 154                | 32.5                                         | 87.0                        | 88                         |
| <i>Inv-Mxi-Spa</i>  | <i>Escherichia coli</i><br>O157:H7 str. Sakai                                | <i>eivI</i>      | BAB3715<br>2      | 111                | 63.9                                         | 89.1                        | 77                         |
|                     | <i>Shigella flexneri</i>                                                     | <i>spa13</i>     | CAC0582<br>5      | 112                | 59.8                                         | 89.3                        | 43                         |
|                     | <i>Sodalis glossinidius</i>                                                  | <i>spaM-like</i> | AAG4860<br>3      | 154                | 27.3                                         | 77.3                        | 33                         |
|                     | <i>Yersinia enterocolitica</i> A127                                          | <i>orf8</i>      | AAK8413<br>0      | 151                | 82.8                                         | 93.4                        | 92                         |
| <i>Chlamydiales</i> | <i>Chlamydia trachomatis</i> D/UW-3/CX                                       | <i>CT670</i>     | NP_22018<br>9     | 168                | 89.3                                         | 91.7                        | 92                         |
|                     | <i>Chlamydomphila pneumoniae</i> AR39<br>( <i>Chlamydia pneumoniae</i> AR39) | <i>CP_0040</i>   | AAF3793<br>5      | 168                | 82.7                                         | 91.6                        | 89                         |

| <b>T3SS family</b>       | <b>Organism</b>                | <b>Gene / Locus</b> | <b>Entrez Protein ID</b> | <b>Number of residues</b> | <b>Predicted disordered segments<sup>‡</sup> %</b> | <b>Predicted <math>\alpha</math>-helix %</b> | <b>Predicted heptad repeats %</b> |
|--------------------------|--------------------------------|---------------------|--------------------------|---------------------------|----------------------------------------------------|----------------------------------------------|-----------------------------------|
| <i>Rhizo-<br/>biales</i> | <i>Mesorhizobium loti</i>      | <i>mlr634</i>       | BAB5265                  | 177                       | 37.3                                               | 90.9                                         | 58                                |
|                          | MAFF303099                     | 3                   | 3                        |                           |                                                    |                                              |                                   |
|                          | <i>Rhizobium</i> sp.<br>NGR234 | <i>y4yJ</i>         | NP_44416<br>2            | 178                       | 66.3                                               | 91.0                                         | 77                                |
| Flagella                 | <i>E. coli</i>                 | <i>fliJ</i>         | P52613                   | 147                       | 100                                                | 91.2                                         | 86                                |

<sup>‡</sup>The % ratio represents the percentage of amino acids assigned with negative score by FoldIndex.
