# Supplementary material
Source: PubMed Central journal article supplement (PMC2662227)
Supplement: M803408200_4.pdf [file M803408200_4.pdf]

**Supplementary Table S3:** Sequence characteristics of HrpE homologues in various T3SS

| T3SS family | Organism                                                                  | Gene / Locus               | Entrez Protein ID | Number of residues | Predicted disordered segments <sup>‡</sup> % | Predicted $\alpha$ -helix % | Predicted heptad repeats % |
|-------------|---------------------------------------------------------------------------|----------------------------|-------------------|--------------------|----------------------------------------------|-----------------------------|----------------------------|
| Ysc         | <i>Aeromonas salmonicida</i> subsp. <i>salmonicida</i> A449               | <i>ascL</i>                | YP_001144270      | 221                | 3.6                                          | 63.8                        | 64                         |
|             | <i>Photorhabdus luminescens</i>                                           | <i>lscL</i>                | AAO18079          | 205                | 29.8                                         | 67.3                        | 56                         |
|             | <i>Pseudomonas aeruginosa</i> PAO1                                        | <i>pscL</i>                | NP_250416         | 214                | 21                                           | 63.1                        | 68                         |
|             | <i>Yersinia pestis</i> CO92                                               | <i>yscL</i>                | NP_395195         | 221                | 17.2                                         | 65.2                        | 50                         |
|             | <i>Vibrio parahaemolyticus</i> RIMD 2210633                               | <i>vp1688</i>              | NP_798067         | 212                | 14.6                                         | 65.1                        | 60                         |
|             | <i>Bordetella pertussis</i> Tohama I                                      | <i>bscL</i>                | NP_880889         | 212                | 25.5                                         | 67.9                        | 58                         |
| Hrc1        | <i>Pseudomonas syringae</i> pv. phaseolicola                              | <i>hrpE</i>                | AAF99296          | 194                | 0                                            | 63.9                        | 52                         |
|             | <i>Pantoea stewartii</i> subsp. <i>stewartii</i>                          | <i>hrpE</i>                | AAG01460          | 199                | 34.7                                         | 60.8                        | 38                         |
|             | <i>Erwinia amylovora</i>                                                  | <i>hrpE</i>                | AAB49176          | 196                | 50                                           | 67.3                        | 49                         |
| Hrc2        | <i>Ralstonia solanacearum</i> GMI1000                                     | <i>hrpF</i>                | NP_522430         | 301                | 29.2                                         | 59                          | 65                         |
|             | <i>Burkholderia pseudomallei</i>                                          | <i>sctL</i>                | AAK73234          | 289                | 30.8                                         | 57.8                        | 57                         |
|             | <i>Xanthomonas campestris</i> pv. <i>Vesicatoria</i> str. 85-10           | <i>hrcL</i>                | YP_362162         | 233                | 17.6                                         | 70.8                        | 54                         |
| Ssa-Esc     | <i>Salmonella typhimurium</i> LT2                                         | <i>ssaK</i>                | NP_460376         | 224                | 34.8                                         | 69.6                        | 26                         |
|             | <i>Edwardsiella tarda</i>                                                 | <i>esaK</i>                | AAX55260          | 271                | 18.1                                         | 55                          | 43                         |
|             | <i>Yersinia pestis</i> CO92                                               | <i>ypo026</i> <sub>5</sub> | NP_403916         | 215                | 0                                            | 68.4                        | 26                         |
|             | Enteropathogenic <i>Escherichia coli</i> E2348/69                         | <i>orf5</i>                | AAC38368          | 231                | 22.5                                         | 62.8                        | 29                         |
|             | <i>Chromobacterium violaceum</i> ATCC12472                                | <i>cv_259</i> <sub>4</sub> | NP_902264         | 268                | 19                                           | 65.3                        | 50                         |
|             | <i>Salmonella enterica</i> subsp. <i>Enterica</i> serovar Typhi str. CT18 | <i>sty170</i> <sub>9</sub> | NP_456117         | 224                | 34.8                                         | 69.6                        | 26                         |
| Inv-Mxi-Spa | <i>Salmonella typhimurium</i> LT2                                         | <i>orgB</i>                | NP_461790         | 226                | 37.2                                         | 71.3                        | 28                         |
|             | <i>Burkholderia pseudomallei</i> K96243                                   | <i>sctL</i>                | YP_111407         | 289                | 30.8                                         | 60.1                        | 57                         |

| <b>T3SS family</b>  | <b>Organism</b>                            | <b>Gene / Locus</b> | <b>Entrez Protein ID</b> | <b>Number of residues</b> | <b>Predicted disordered segments<sup>‡</sup> %</b> | <b>Predicted <math>\alpha</math>-helix %</b> | <b>Predicted heptad repeats %</b> |
|---------------------|--------------------------------------------|---------------------|--------------------------|---------------------------|----------------------------------------------------|----------------------------------------------|-----------------------------------|
|                     | <i>Shigella flexneri</i> 2a str. 301       | <i>mxiN</i>         | NP_858274                | 231                       | 26.9                                               | 73                                           | 70                                |
|                     | <i>Sodalis glossinidius</i> str. morsitans | <i>sg2074</i>       | YP_455754                | 215                       | 18.1                                               | 68.8                                         | 46                                |
|                     | <i>Yersinia enterocolitica</i> A127        | <i>yscL</i>         | AAN37554.1               | 223                       | 17.1                                               | 64                                           | 59                                |
| <i>Chlamydiales</i> | <i>Chlamydia trachomatis</i> D/UW-3/CX     | <i>yscL</i>         | NP_220076                | 223                       | 31.4                                               | 65                                           | 33                                |
|                     | <i>Chlamydomydia pneumoniae</i> AR39       | <i>cp1045</i>       | NP_445582                | 233                       | 31.3                                               | 64.8                                         | 32                                |
| <i>Rhizobiales</i>  | <i>Mesorhizobium loti</i> MAFF303099       | <i>noIV</i>         | NP_106865                | 207                       | 0                                                  | 66.7                                         | 21                                |
|                     | <i>Rhizobium</i> sp. NGR234                | <i>noIV</i>         | NP_444160                | 208                       | 18.3                                               | 66.3                                         | 29                                |
| <i>Flagella</i>     | <i>Escherichia coli</i> O157:H7 EDL933     | <i>fliH</i>         | NP_288401                | 235                       | 40.9                                               | 63                                           | 48                                |

<sup>‡</sup>The % ratio represents the percentage of amino acids assigned with negative score by FoldIndex.
